# Supplementary material
Source: PubMed Central journal article supplement (PMC10509325)
Supplement: NIHMS1907999-supplement-Supplement.pdf [file NIHMS1907999-supplement-Supplement.pdf]

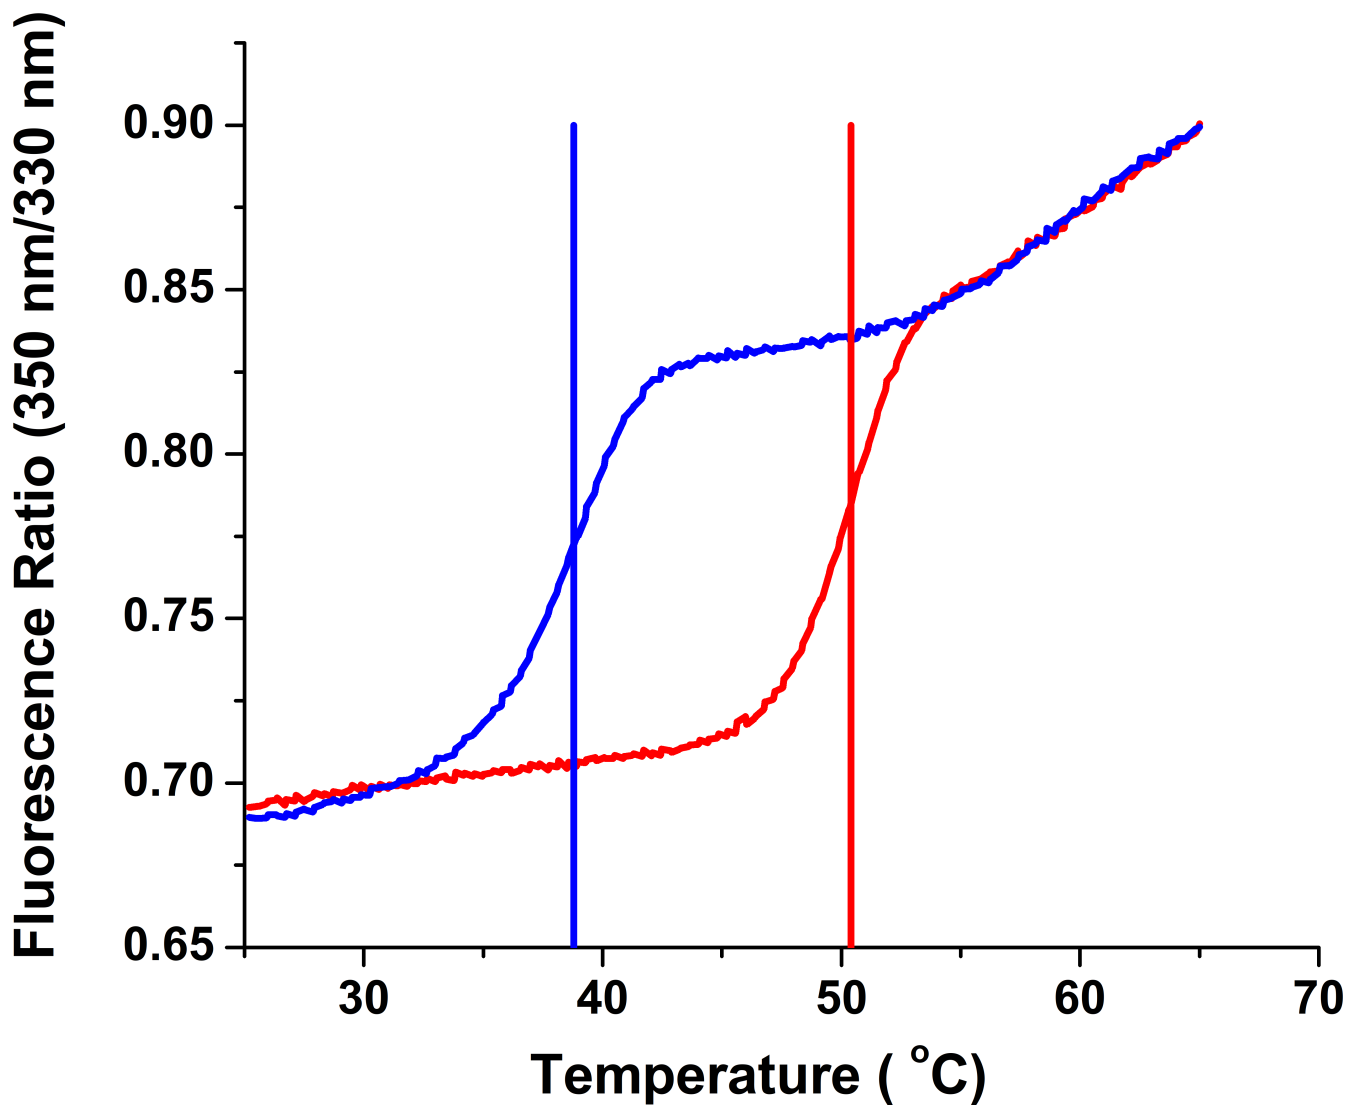

Supplementary file1 (TIF 379 KB) The differential scanning fluorimetry results showing the melting curve of NET-1 in the presence of 1 mM CaCl<sub>2</sub> (red) and 1 mM EDTA (blue). The melting temperature of NET-1 in the presence of 1 mM EDTA is 38.8 °C (vertical blue line) and in the presence of 1 mM CaCl<sub>2</sub> the melting temperature is 50.4 °C (vertical red line)
